# Supplementary material for: Large scale brain network dynamics in very preterm children and relationship with socio-emotional outcomes
Source: bioRxiv or medRxiv preprint supplement (doi:10.1101/2022.03.18.22272505), 2022-03-21
Supplement: Supplementary file [file media-1.pdf]

# Supplementary Materials

## Supplementary figures

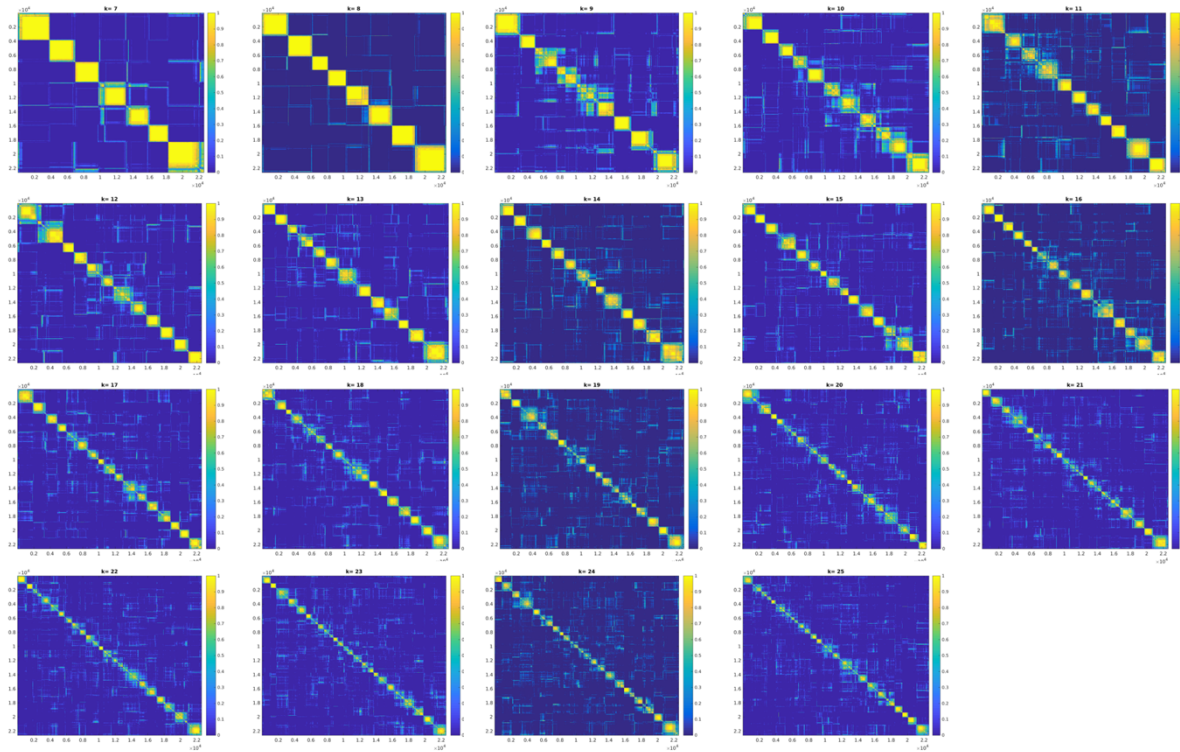

**Figure S1.** Consensus matrices for cluster numbers  $K = 7$  to  $K = 25$ . High values in the matrix indicate that the two corresponding frames were clustered together during re-sampling. A value of 1 means that the frames were always clustered together, while a value of 0 means that the frames were never clustered together. We selected to use  $K = 13$  based on visual inspection of the consensus matrices and evaluation of consensus clustering quality measures (Monti et al., 2003). In Supplementary Figure S2, we plot the distribution of average consensus values per cluster to assess the quality of the clustering for each  $K$ .

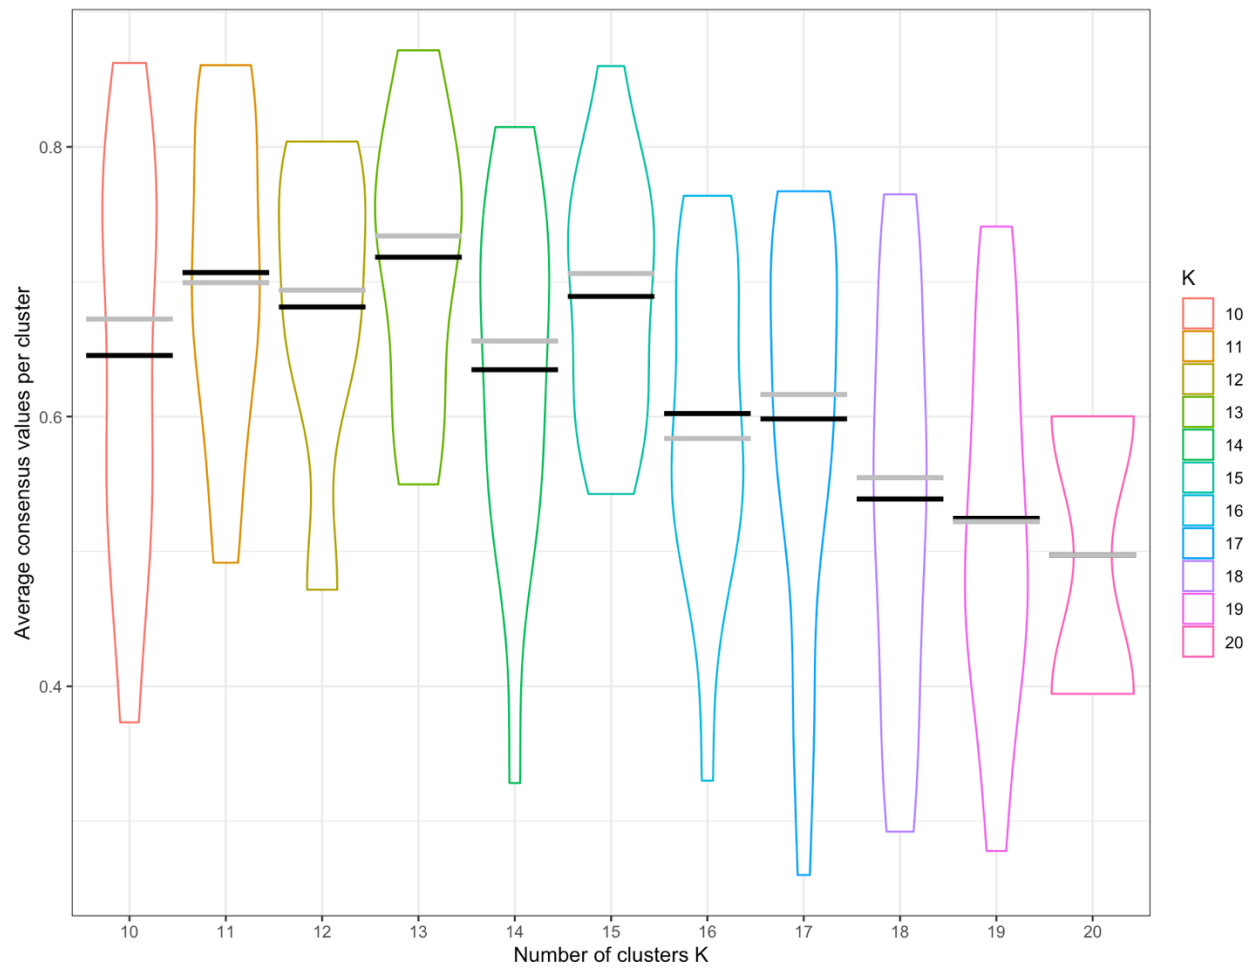

**Figure S2.** Consensus clustering quality measures for cluster numbers  $K = 10$  to  $K = 20$ . The distribution of average consensus values per cluster: the mean for each cluster is represented by a black line and the median is represented by a grey line. Mean consensus is maximal (closest to 1) for  $K = 13$ .

## Supplementary Tables

**Table S1.** iCAPs functional networks of regions from the automated anatomical labeling 2 (AAL2) atlas. Percentiles indicate the fraction of voxels of a functional network or region that have a z-score > 2.3. A network/region is listed if more than 20% of the network/region is included in the iCAP.

| iCAP          | Lobe            | Region            | Percentile | mean z-score | voxels |
|---------------|-----------------|-------------------|------------|--------------|--------|
| <b>iCAP 1</b> | Parietal        | Parietal_Sup_R    | 64.82      | 2.14         | 457    |
|               | Parietal        | Parietal_Sup_L    | 64.6       | 2.12         | 480    |
|               | Occipital       | Occipital_Sup_L   | 52.4       | 2.11         | 164    |
|               | Occipital       | Occipital_Sup_R   | 50.49      | 2.18         | 154    |
|               | Parietal        | Angular_R         | 29.57      | 1.97         | 225    |
|               | Posterior Fossa | Cerebelum_6_R     | 27.52      | 1.8          | 368    |
|               | Parietal        | Precuneus_L       | 23.9       | 1.92         | 365    |
|               | Parietal        | Precuneus_R       | 23.21      | 1.84         | 331    |
|               | Posterior Fossa | Cerebelum_Crus1_L | 19.67      | 1.71         | 302    |
|               | Posterior Fossa | Cerebelum_Crus1_R | 18.27      | 1.72         | 273    |
|               | Posterior Fossa | Cerebelum_6_L     | 17.7       | 1.65         | 229    |
|               | Parietal        | Parietal_Inf_L    | 16.4       | 1.84         | 208    |
|               | Occipital       | Cuneus_R          | 14.68      | 1.75         | 74     |
|               | Occipital       | Occipital_Mid_R   | 13.65      | 1.94         | 107    |
|               | Occipital       | Occipital_Mid_L   | 12.91      | 2.05         | 143    |
|               | Occipital       | Cuneus_L          | 11.24      | 1.78         | 79     |
|               | Parietal        | Parietal_Inf_R    | 10.16      | 1.65         | 78     |
| <b>iCAP 2</b> | Parietal        | SupraMarginal_L   | 79.53      | 2.73         | 470    |
|               | Central         | Rolandic_Oper_L   | 62.3       | 2.07         | 304    |
|               | Parietal        | SupraMarginal_R   | 62.06      | 2.68         | 535    |
|               | Frontal         | Rolandic_Oper_R   | 58.16      | 2.04         | 342    |
|               | Central         | Postcentral_L     | 57.39      | 2.2          | 652    |

|               |                 |                    |       |      |     |
|---------------|-----------------|--------------------|-------|------|-----|
|               | Central         | Precentral_R       | 57.39 | 1.96 | 621 |
|               | Central         | Postcentral_R      | 49.44 | 2.48 | 613 |
|               | Temporal        | Heschl_L           | 35.81 | 1.74 | 53  |
|               | Central         | Precentral_L       | 35.13 | 1.82 | 372 |
|               | Frontal         | Supp_Motor_Area_R  | 33.33 | 1.82 | 121 |
|               | Temporal        | Temporal_Sup_L     | 30.44 | 2.12 | 309 |
|               | Frontal         | Supp_Motor_Area_L  | 29.17 | 1.82 | 119 |
|               | Limbic          | Insula_L           | 26.58 | 1.79 | 248 |
|               | Temporal        | Heschl_R           | 25.76 | 1.68 | 17  |
|               | Limbic          | Insula_R           | 24.33 | 1.75 | 236 |
|               | Limbic          | Cingulate_Mid_L    | 21.08 | 1.81 | 219 |
|               | Limbic          | Cingulate_Mid_R    | 20.57 | 1.81 | 224 |
|               | Parietal        | Parietal_Inf_L     | 20.43 | 2.31 | 259 |
|               | Frontal         | Frontal_Inf_Oper_L | 16.27 | 1.75 | 61  |
|               | Frontal         | Frontal_Inf_Oper_R | 15.52 | 1.64 | 88  |
|               | Temporal        | Temporal_Sup_R     | 10.06 | 1.87 | 104 |
| <b>iCAP 3</b> | Posterior Fossa | Cerebelum_4_5_R    | 83.05 | 2.1  | 544 |
|               | Posterior Fossa | Vermis_9           | 81.72 | 1.83 | 76  |
|               | Posterior Fossa | Vermis_3           | 80.95 | 1.87 | 17  |
|               | Posterior Fossa | Cerebelum_4_5_L    | 75.31 | 2.05 | 540 |
|               | Posterior Fossa | Vermis_4_5         | 67.33 | 2.01 | 204 |
|               | Posterior Fossa | Cerebelum_9_R      | 62.07 | 1.74 | 36  |
|               | Posterior Fossa | Cerebelum_3_R      | 54.84 | 1.97 | 17  |
|               | Posterior Fossa | Vermis_8           | 46.58 | 1.63 | 68  |
|               | Posterior Fossa | Cerebelum_3_L      | 38.46 | 1.85 | 5   |
|               | Posterior Fossa | Cerebelum_9_L      | 36.36 | 1.67 | 20  |
|               | Posterior Fossa | Vermis_7           | 27.01 | 1.6  | 37  |
|               | Occipital       | Fusiform_R         | 22.68 | 1.83 | 276 |

|               |                 |                      |       |      |      |
|---------------|-----------------|----------------------|-------|------|------|
|               | Posterior Fossa | Vermis_6             | 20.97 | 1.65 | 56   |
|               | Posterior Fossa | Cerebelum_6_L        | 19.09 | 1.74 | 247  |
|               | Posterior Fossa | Cerebelum_6_R        | 15.56 | 1.74 | 208  |
|               | Occipital       | Fusiform_L           | 14.74 | 1.82 | 175  |
|               | Occipital       | Lingual_R            | 14.69 | 1.82 | 144  |
|               | Posterior Fossa | Vermis_1_2           | 12.5  | 1.71 | 1    |
|               | Occipital       | Lingual_L            | 10.48 | 1.79 | 103  |
| <b>iCAP 4</b> | Parietal        | Parietal_Sup_L       | 99.06 | 2.51 | 736  |
|               | Parietal        | Parietal_Sup_R       | 99.01 | 2.35 | 698  |
|               | Frontal         | Paracentral_Lobule_R | 92.68 | 2.02 | 76   |
|               | Frontal         | Paracentral_Lobule_L | 88.69 | 2.41 | 149  |
|               | Parietal        | Parietal_Inf_R       | 84.11 | 2.03 | 646  |
|               | Frontal         | Supp_Motor_Area_R    | 83.2  | 2.1  | 302  |
|               | Parietal        | Parietal_Inf_L       | 80.84 | 2.02 | 1025 |
|               | Central         | Postcentral_R        | 70.73 | 2.32 | 877  |
|               | Frontal         | Supp_Motor_Area_L    | 69.85 | 2.11 | 285  |
|               | Central         | Postcentral_L        | 51.41 | 2.4  | 584  |
|               | Central         | Precentral_R         | 48.24 | 2.19 | 522  |
|               | Occipital       | Occipital_Sup_R      | 43.28 | 1.87 | 132  |
|               | Parietal        | Angular_R            | 43.23 | 1.93 | 329  |
|               | Central         | Precentral_L         | 40.13 | 2.22 | 425  |
|               | Occipital       | Occipital_Sup_L      | 39.3  | 1.89 | 123  |
|               | Parietal        | Precuneus_L          | 37    | 2.31 | 565  |
|               | Frontal         | Frontal_Sup_2_R      | 34.5  | 2.41 | 376  |
|               | Parietal        | Precuneus_R          | 30.86 | 1.98 | 440  |
|               | Frontal         | Frontal_Sup_2_L      | 24.28 | 2.3  | 219  |
|               | Parietal        | Angular_L            | 21.94 | 1.8  | 129  |
|               | Limbic          | Cingulate_Mid_R      | 20.48 | 1.63 | 223  |

|               |                 |                   |       |      |      |
|---------------|-----------------|-------------------|-------|------|------|
|               | Parietal        | SupraMarginal_L   | 14.72 | 1.73 | 87   |
|               | Limbic          | Cingulate_Mid_L   | 14.53 | 1.59 | 151  |
|               | Occipital       | Occipital_Mid_L   | 12.18 | 1.86 | 135  |
|               | Parietal        | SupraMarginal_R   | 10.9  | 1.75 | 94   |
|               | Occipital       | Cuneus_R          | 10.71 | 1.69 | 54   |
| <b>iCAP 5</b> | Frontal         | Frontal_Med_Orb_L | 100   | 1.53 | 1    |
|               | Limbic          | Cingulate_Post_L  | 96.28 | 3.15 | 181  |
|               | Parietal        | Angular_L         | 92.52 | 2.96 | 544  |
|               | Limbic          | Cingulate_Post_R  | 89.16 | 3.07 | 74   |
|               | Parietal        | Angular_R         | 79.89 | 2.6  | 608  |
|               | Parietal        | Parietal_Inf_R    | 70.96 | 2.72 | 545  |
|               | Parietal        | Parietal_Inf_L    | 62.22 | 2.72 | 789  |
|               | Parietal        | Precuneus_L       | 54.94 | 2.64 | 839  |
|               | Parietal        | Precuneus_R       | 45.93 | 2.69 | 655  |
|               | Limbic          | Cingulate_Mid_L   | 43.89 | 2.59 | 456  |
|               | Limbic          | Cingulate_Mid_R   | 41.41 | 2.72 | 451  |
|               | Frontal         | Frontal_Med_Orb_R | 33.33 | 1.6  | 15   |
|               | Parietal        | SupraMarginal_R   | 27.96 | 2.22 | 241  |
|               | Parietal        | Parietal_Sup_L    | 19.92 | 2.22 | 148  |
|               | Temporal        | Temporal_Mid_L    | 17.62 | 1.7  | 399  |
|               | Parietal        | Parietal_Sup_R    | 15.32 | 2.09 | 108  |
|               | Parietal        | SupraMarginal_L   | 10.49 | 1.91 | 62   |
|               | Limbic          | Cingulate_Ant_L   | 10.08 | 1.6  | 79   |
| <b>iCAP 6</b> | Posterior Fossa | Cerebelum_7b_R    | 100   | 2.17 | 46   |
|               | Posterior Fossa | Cerebelum_8_R     | 98.75 | 1.99 | 79   |
|               | Posterior Fossa | Cerebelum_Crus1_R | 97.52 | 2.65 | 1457 |
|               | Posterior Fossa | Cerebelum_Crus1_L | 95.77 | 2.51 | 1470 |
|               | Posterior Fossa | Vermis_8          | 95.21 | 1.93 | 139  |

|                 |                   |       |      |      |
|-----------------|-------------------|-------|------|------|
| Posterior Fossa | Cerebelum_6_R     | 91.4  | 2.42 | 1222 |
| Posterior Fossa | Cerebelum_9_L     | 90.91 | 1.77 | 50   |
| Posterior Fossa | Cerebelum_7b_L    | 90.22 | 1.9  | 83   |
| Posterior Fossa | Cerebelum_Crus2_L | 89.57 | 2.21 | 713  |
| Posterior Fossa | Cerebelum_Crus2_R | 88.65 | 2.29 | 609  |
| Posterior Fossa | Vermis_7          | 88.32 | 2.21 | 121  |
| Posterior Fossa | Vermis_9          | 88.17 | 1.91 | 82   |
| Posterior Fossa | Cerebelum_6_L     | 82.3  | 2.23 | 1065 |
| Posterior Fossa | Cerebelum_8_L     | 81.25 | 1.75 | 52   |
| Posterior Fossa | Cerebelum_9_R     | 74.14 | 1.81 | 43   |
| Posterior Fossa | Vermis_6          | 60.67 | 1.91 | 162  |
| Occipital       | Occipital_Inf_R   | 53.15 | 1.81 | 118  |
| Occipital       | Fusiform_R        | 40.51 | 2.13 | 493  |
| Occipital       | Lingual_R         | 36.84 | 1.97 | 361  |
| Occipital       | Fusiform_L        | 33.36 | 2    | 396  |
| Occipital       | Lingual_L         | 20.85 | 1.88 | 205  |
| Temporal        | Temporal_Inf_R    | 13.32 | 1.78 | 151  |
| Occipital       | Occipital_Inf_L   | 12.5  | 1.64 | 31   |
| Temporal        | Temporal_Inf_L    | 10.61 | 1.75 | 89   |

---

**iCAP 7**

|          |                     |       |      |      |
|----------|---------------------|-------|------|------|
| Frontal  | Frontal_Inf_Tri_R   | 99.7  | 3.12 | 655  |
| Frontal  | Frontal_Inf_Oper_R  | 99.12 | 2.95 | 562  |
| Central  | Frontal_Inf_Orb_2_R | 92.93 | 2.25 | 92   |
| Frontal  | Frontal_Mid_2_R     | 91.08 | 2.78 | 1593 |
| Frontal  | Rolandic_Oper_R     | 81.12 | 2.02 | 477  |
| Temporal | Temporal_Pole_Mid_R | 78.57 | 1.82 | 22   |
| Parietal | SupraMarginal_R     | 74.83 | 1.86 | 645  |
| Limbic   | Insula_R            | 73.09 | 2.1  | 709  |
| Temporal | Temporal_Sup_R      | 72.05 | 1.92 | 745  |

|               |                          |                      |       |      |     |
|---------------|--------------------------|----------------------|-------|------|-----|
|               | Temporal                 | Temporal_Pole_Sup_R  | 69.19 | 1.97 | 128 |
|               | Frontal                  | OFCpost_R            | 66.67 | 1.55 | 4   |
|               | Frontal                  | Frontal_Sup_2_R      | 56.97 | 2.22 | 621 |
|               | Subcortical grey nucleus | Putamen_R            | 45.15 | 1.77 | 279 |
|               | Temporal                 | Heschl_R             | 43.94 | 1.98 | 29  |
|               | Parietal                 | Parietal_Inf_R       | 39.58 | 1.93 | 304 |
|               | Central                  | Postcentral_R        | 38.15 | 1.87 | 473 |
|               | Temporal                 | Temporal_Mid_R       | 36.18 | 1.82 | 683 |
|               | Central                  | Precentral_R         | 35.95 | 2.2  | 389 |
|               | Frontal                  | Frontal_Sup_Medial_R | 20.39 | 1.65 | 73  |
|               | Temporal                 | Temporal_Inf_R       | 11.2  | 1.61 | 127 |
|               | Central                  | Rolandic_Oper_L      | 98.57 | 2.8  | 481 |
|               | Limbic                   | Insula_R             | 98.56 | 2.55 | 956 |
|               | Limbic                   | Insula_L             | 98.07 | 2.66 | 915 |
|               | Temporal                 | Heschl_L             | 97.97 | 2.58 | 145 |
| <b>iCAP 8</b> | Frontal                  | Rolandic_Oper_R      | 97.79 | 2.58 | 575 |
|               | Temporal                 | Heschl_R             | 96.97 | 2.3  | 64  |
|               | Temporal                 | Temporal_Pole_Sup_R  | 92.97 | 2.35 | 172 |
|               | Temporal                 | Temporal_Pole_Mid_R  | 92.86 | 2.03 | 26  |
|               | Temporal                 | Temporal_Pole_Sup_L  | 90.07 | 2.28 | 127 |
|               | Subcortical grey nucleus | Putamen_R            | 86.89 | 2.17 | 537 |
|               | Subcortical grey nucleus | Putamen_L            | 83.92 | 2.21 | 407 |
|               | Frontal                  | OFCpost_R            | 83.33 | 1.83 | 5   |
|               | Subcortical grey nucleus | Amygdala_R           | 82.41 | 1.95 | 89  |
|               | Temporal                 | Temporal_Sup_L       | 80.99 | 2.23 | 822 |
|               | Frontal                  | Frontal_Inf_Orb_2_L  | 80.67 | 1.99 | 121 |
|               | Central                  | Frontal_Inf_Orb_2_R  | 77.78 | 1.94 | 77  |
|               | Subcortical grey nucleus | Amygdala_L           | 62.6  | 1.86 | 77  |



|                          |                    |       |      |     |
|--------------------------|--------------------|-------|------|-----|
| Frontal                  | OFCpost_L          | 62.5  | 1.69 | 5   |
| Limbic                   | Hippocampus_R      | 53.23 | 1.77 | 107 |
| Subcortical grey nucleus | Pallidum_R         | 51.85 | 1.87 | 28  |
| Temporal                 | Temporal_Sup_R     | 50.39 | 2.02 | 521 |
| Frontal                  | Frontal_Inf_Tri_R  | 46.58 | 1.99 | 306 |
| Frontal                  | Frontal_Inf_Oper_L | 44.53 | 2.05 | 167 |
| Frontal                  | Frontal_Inf_Tri_L  | 38.62 | 2.09 | 297 |
| Frontal                  | Frontal_Inf_Oper_R | 34.04 | 2.26 | 193 |
| Frontal                  | Olfactory_R        | 28.67 | 1.91 | 43  |
| Limbic                   | Hippocampus_L      | 28.02 | 1.7  | 72  |
| Limbic                   | ParaHippocampal_R  | 25.97 | 1.78 | 120 |
| Parietal                 | SupraMarginal_L    | 23.01 | 2.16 | 136 |
| Subcortical grey nucleus | Pallidum_L         | 21.74 | 1.78 | 10  |
| Parietal                 | SupraMarginal_R    | 17.52 | 2.03 | 151 |
| Frontal                  | Olfactory_L        | 16.33 | 1.88 | 16  |
| Subcortical grey nucleus | Caudate_R          | 13.39 | 1.61 | 32  |
| Central                  | Postcentral_L      | 10.56 | 2.22 | 120 |

---

**iCAP 9**

|          |                     |       |      |      |
|----------|---------------------|-------|------|------|
| Frontal  | Frontal_Inf_Tri_L   | 99.22 | 2.76 | 763  |
| Frontal  | Frontal_Inf_Oper_L  | 98.93 | 2.67 | 371  |
| Frontal  | Frontal_Mid_2_L     | 95.41 | 2.33 | 1434 |
| Frontal  | Frontal_Inf_Orb_2_L | 95.33 | 2.16 | 143  |
| Central  | Rolandic_Oper_L     | 91.8  | 1.92 | 448  |
| Parietal | SupraMarginal_L     | 88.16 | 1.99 | 521  |
| Temporal | Temporal_Sup_L      | 87.68 | 2.13 | 890  |
| Temporal | Temporal_Pole_Sup_L | 79.43 | 2.16 | 112  |
| Limbic   | Insula_L            | 78.03 | 1.91 | 728  |
| Temporal | Heschl_L            | 75.68 | 1.84 | 112  |
| Frontal  | OFCpost_L           | 75    | 1.69 | 6    |

|                |                          |                      |       |      |      |
|----------------|--------------------------|----------------------|-------|------|------|
|                | Temporal                 | Temporal_Mid_L       | 69.52 | 2.15 | 1574 |
|                | Central                  | Precentral_L         | 66.1  | 2.51 | 700  |
|                | Frontal                  | Frontal_Sup_2_L      | 64.19 | 1.89 | 579  |
|                | Parietal                 | Parietal_Inf_L       | 53.71 | 1.84 | 681  |
|                | Central                  | Postcentral_L        | 52.64 | 1.93 | 598  |
|                | Parietal                 | Angular_L            | 47.45 | 1.83 | 279  |
|                | Subcortical grey nucleus | Putamen_L            | 47.01 | 1.71 | 228  |
|                | Frontal                  | Frontal_Sup_Medial_L | 22.36 | 1.75 | 108  |
|                | Temporal                 | Temporal_Inf_L       | 21.1  | 1.68 | 177  |
| <b>iCAP 10</b> | Occipital                | Occipital_Mid_R      | 88.39 | 3.1  | 693  |
|                | Occipital                | Occipital_Mid_L      | 82.58 | 3.1  | 915  |
|                | Occipital                | Occipital_Inf_L      | 71.77 | 2.34 | 178  |
|                | Temporal                 | Temporal_Mid_R       | 55.56 | 2.79 | 1049 |
|                | Occipital                | Occipital_Inf_R      | 49.55 | 2.02 | 110  |
|                | Occipital                | Occipital_Sup_L      | 43.77 | 2.35 | 137  |
|                | Temporal                 | Temporal_Mid_L       | 41.03 | 2.31 | 929  |
|                | Occipital                | Occipital_Sup_R      | 31.15 | 2.26 | 95   |
|                | Occipital                | Cuneus_L             | 27.45 | 1.79 | 193  |
|                | Temporal                 | Temporal_Sup_R       | 27.27 | 2.05 | 282  |
|                | Parietal                 | Angular_R            | 26.68 | 1.97 | 203  |
|                | Parietal                 | Angular_L            | 21.77 | 1.89 | 128  |
|                | Temporal                 | Temporal_Inf_R       | 21.16 | 2.09 | 240  |
|                | Occipital                | Cuneus_R             | 18.45 | 1.74 | 93   |
|                | Occipital                | Calcarine_L          | 11.05 | 1.69 | 121  |
|                | Temporal                 | Temporal_Sup_L       | 11.03 | 1.85 | 112  |
|                | Temporal                 | Temporal_Inf_L       | 10.25 | 1.93 | 86   |
|                | Posterior Fossa          | Cerebelum_Crus2_R    | 10.19 | 1.64 | 70   |
|                | Occipital                | Calcarine_R          | 10.06 | 1.57 | 63   |

|                |                 |                      |                   |       |      |
|----------------|-----------------|----------------------|-------------------|-------|------|
| <b>iCAP 11</b> | Occipital       | Cuneus_L             | 99.86             | 2.98  | 702  |
|                | Occipital       | Cuneus_R             | 94.84             | 2.61  | 478  |
|                | Occipital       | Calcarine_R          | 94.09             | 3.62  | 589  |
|                | Occipital       | Occipital_Sup_L      | 84.66             | 2.06  | 265  |
|                | Occipital       | Calcarine_L          | 81.28             | 3.46  | 890  |
|                | Occipital       | Lingual_L            | 69.68             | 2.48  | 685  |
|                | Occipital       | Lingual_R            | 55.2              | 2.33  | 541  |
|                | Occipital       | Occipital_Sup_R      | 55.08             | 1.82  | 168  |
|                | Occipital       | Occipital_Mid_R      | 43.49             | 1.76  | 341  |
|                | Parietal        | Precuneus_R          | 43.27             | 2.79  | 617  |
|                | Occipital       | Occipital_Mid_L      | 42.96             | 1.88  | 476  |
|                | Parietal        | Precuneus_L          | 31.83             | 2.55  | 486  |
|                | Posterior Fossa | Cerebelum_4_5_L      | 11.44             | 1.92  | 82   |
|                | <b>iCAP 12</b>  | Frontal              | Frontal_Med_Orb_L | 100   | 4.19 |
| Frontal        |                 | Frontal_Med_Orb_R    | 95.56             | 3.19  | 43   |
| Limbic         |                 | Cingulate_Ant_R      | 94.95             | 3.05  | 470  |
| Frontal        |                 | Frontal_Sup_Medial_R | 88.27             | 3.05  | 316  |
| Limbic         |                 | Cingulate_Ant_L      | 86.73             | 3.07  | 680  |
| Frontal        |                 | Frontal_Sup_Medial_L | 79.5              | 2.6   | 384  |
| Frontal        |                 | Frontal_Inf_Orb_2_L  | 75.33             | 1.84  | 113  |
| Frontal        |                 | Frontal_Sup_2_L      | 65.96             | 3.04  | 595  |
| Frontal        |                 | Frontal_Inf_Tri_L    | 65.15             | 2.21  | 501  |
| Frontal        |                 | Frontal_Mid_2_L      | 63.87             | 2.68  | 960  |
| Frontal        |                 | Frontal_Mid_2_R      | 61.58             | 2.64  | 1077 |
| Frontal        |                 | Frontal_Sup_2_R      | 54.5              | 3.34  | 594  |
| Frontal        |                 | Frontal_Inf_Tri_R    | 49.01             | 2.1   | 322  |
| Central        |                 | Frontal_Inf_Orb_2_R  | 40.4              | 2.22  | 40   |
| <b>iCAP 13</b> |                 | Posterior Fossa      | Cerebelum_Crus2_R | 87.19 | 3.47 |

|                 |                   |       |      |     |
|-----------------|-------------------|-------|------|-----|
| Posterior Fossa | Cerebelum_Crus2_L | 86.06 | 3.58 | 685 |
| Posterior Fossa | Vermis_8          | 84.93 | 2.74 | 124 |
| Occipital       | Occipital_Inf_R   | 79.28 | 2.27 | 176 |
| Posterior Fossa | Cerebelum_8_L     | 67.19 | 2.09 | 43  |
| Posterior Fossa | Cerebelum_8_R     | 66.25 | 2.03 | 53  |
| Occipital       | Occipital_Inf_L   | 63.31 | 2.25 | 157 |
| Posterior Fossa | Cerebelum_7b_R    | 63.04 | 2.22 | 29  |
| Posterior Fossa | Vermis_7          | 53.28 | 2.02 | 73  |
| Posterior Fossa | Cerebelum_7b_L    | 53.26 | 2.77 | 49  |
| Posterior Fossa | Cerebelum_Crus1_R | 52.28 | 2.94 | 781 |
| Posterior Fossa | Cerebelum_Crus1_L | 51.99 | 2.83 | 798 |
| Posterior Fossa | Vermis_9          | 38.71 | 2.17 | 36  |
| Temporal        | Temporal_Inf_R    | 27.95 | 1.85 | 317 |
| Posterior Fossa | Cerebelum_9_L     | 27.27 | 1.86 | 15  |
| Posterior Fossa | Cerebelum_9_R     | 24.14 | 2.09 | 14  |
| Occipital       | Lingual_R         | 20.2  | 2.57 | 198 |
| Posterior Fossa | Vermis_6          | 18.73 | 1.99 | 50  |
| Occipital       | Calcarine_L       | 17.72 | 2.14 | 194 |
| Temporal        | Temporal_Inf_L    | 17.16 | 1.8  | 144 |
| Occipital       | Occipital_Mid_L   | 13.9  | 1.89 | 154 |
| Occipital       | Fusiform_L        | 12.97 | 2.06 | 154 |
| Occipital       | Lingual_L         | 12.11 | 2.71 | 119 |

---

**Table S2.** Group comparison for the VPT and full-term control groups for the occurrence of the identified iCAPs networks

| iCAPs – Occurrence | VPT group |       | Full-term group |       | Group comparison |        |         |               |                 |
|--------------------|-----------|-------|-----------------|-------|------------------|--------|---------|---------------|-----------------|
|                    | Mean      | SD    | Mean_FT         | SD_FT | t                | df     | p-value | q-value (fdr) | Effect size (d) |
| iCAP 1             | 34.679    | 5.863 | 34.333          | 3.774 | 0.222            | 31.705 | 0.826   | 0.948         | 0.065           |
| iCAP 2             | 28.179    | 6.301 | 28.583          | 4.814 | -0.221           | 27.127 | 0.827   | 0.948         | -0.068          |
| iCAP 3             | 24.179    | 6.037 | 24.583          | 7.879 | -0.159           | 16.799 | 0.876   | 0.948         | -0.061          |
| iCAP 4             | 17.286    | 3.670 | 17.333          | 4.559 | -0.032           | 17.411 | 0.975   | 0.975         | -0.012          |
| iCAP 5             | 20.357    | 6.442 | 24.083          | 6.288 | -1.705           | 21.361 | 0.103   | 0.948         | -0.582          |
| iCAP 6             | 23.321    | 6.481 | 24.750          | 4.159 | -0.833           | 31.786 | 0.411   | 0.948         | -0.242          |
| iCAP 7             | 17.393    | 4.856 | 17.000          | 5.908 | 0.203            | 17.687 | 0.842   | 0.948         | 0.076           |
| iCAP 8             | 14.893    | 5.370 | 13.333          | 5.483 | 0.829            | 20.494 | 0.416   | 0.948         | 0.289           |
| iCAP 9             | 20.214    | 5.776 | 21.667          | 5.416 | -0.762           | 22.188 | 0.454   | 0.948         | -0.256          |
| iCAP 10            | 17.000    | 5.185 | 17.917          | 5.485 | -0.492           | 19.855 | 0.628   | 0.948         | -0.174          |
| iCAP 11            | 8.750     | 4.070 | 8.167           | 5.167 | 0.348            | 17.134 | 0.732   | 0.948         | 0.132           |
| iCAP 12            | 9.250     | 4.291 | 7.500           | 5.018 | 1.054            | 18.246 | 0.306   | 0.948         | 0.388           |
| iCAP 13            | 4.500     | 2.975 | 3.917           | 1.505 | 0.821            | 36.728 | 0.417   | 0.948         | 0.221           |

**Table S3.** Group comparison for the VPT and full-term control groups for the total duration of the identified iCAPs networks

| iCAPs – Total duration | VPT group |        | Full-term group |       | Group comparison |        |         |               |                 |
|------------------------|-----------|--------|-----------------|-------|------------------|--------|---------|---------------|-----------------|
|                        | Mean      | SD     | Mean_FT         | SD_FT | t                | df     | p-value | q-value (fdr) | Effect size (d) |
| iCAP 1                 | 44.477    | 8.636  | 49.705          | 8.020 | -1.846           | 22.396 | 0.078   | 0.508         | -0.618          |
| iCAP 2                 | 32.072    | 9.216  | 33.036          | 7.019 | -0.361           | 27.211 | 0.721   | 0.781         | -0.112          |
| iCAP 3                 | 21.889    | 5.857  | 20.643          | 5.536 | 0.641            | 22.023 | 0.528   | 0.687         | 0.216           |
| iCAP 4                 | 19.855    | 4.991  | 17.964          | 6.581 | 0.891            | 16.679 | 0.385   | 0.557         | 0.344           |
| iCAP 5                 | 24.793    | 10.264 | 29.196          | 8.310 | -1.427           | 25.624 | 0.166   | 0.525         | -0.452          |
| iCAP 6                 | 23.950    | 7.687  | 26.015          | 5.529 | -0.957           | 28.738 | 0.346   | 0.557         | -0.290          |
| iCAP 7                 | 23.661    | 6.349  | 20.995          | 6.528 | 1.193            | 20.364 | 0.247   | 0.534         | 0.416           |
| iCAP 8                 | 15.501    | 7.707  | 12.746          | 5.295 | 1.305            | 29.972 | 0.202   | 0.525         | 0.388           |
| iCAP 9                 | 23.614    | 7.244  | 27.313          | 7.637 | -1.425           | 19.912 | 0.170   | 0.525         | -0.503          |
| iCAP 10                | 17.618    | 6.518  | 17.781          | 5.031 | -0.086           | 26.856 | 0.932   | 0.932         | -0.027          |
| iCAP 11                | 10.408    | 6.744  | 9.193           | 6.657 | 0.527            | 21.136 | 0.604   | 0.713         | 0.181           |
| iCAP 12                | 8.360     | 4.815  | 5.876           | 3.488 | 1.830            | 28.548 | 0.078   | 0.508         | 0.555           |
| iCAP 13                | 4.248     | 3.084  | 3.334           | 2.205 | 1.059            | 28.895 | 0.298   | 0.554         | 0.320           |

**Table S4.** Group comparison for the VPT and full-term control groups for the coupling of the identified iCAPs networks

| Coupling       | VPT group |       | Full-term group |       | Group comparison |        |         |               |                 |
|----------------|-----------|-------|-----------------|-------|------------------|--------|---------|---------------|-----------------|
|                | Mean      | SD    | Mean            | SD    | t                | df     | p-value | q-value (fdr) | Effect size (d) |
| iCAP1 & iCAP2  | 0.116     | 0.068 | 0.121           | 0.054 | -0.241           | 26.174 | 0.812   | 0.972         | -0.076          |
| iCAP1 & iCAP3  | 0.09      | 0.046 | 0.101           | 0.042 | -0.713           | 22.705 | 0.483   | 0.972         | -0.237          |
| iCAP1 & iCAP4  | 0.03      | 0.029 | 0.032           | 0.025 | -0.264           | 24.235 | 0.794   | 0.972         | -0.086          |
| iCAP1 & iCAP5  | 0.064     | 0.025 | 0.067           | 0.039 | -0.228           | 15.255 | 0.823   | 0.972         | -0.093          |
| iCAP1 & iCAP6  | 0.044     | 0.027 | 0.022           | 0.015 | 3.128            | 35.445 | 0.004   | 0.035         | 0.863           |
| iCAP1 & iCAP7  | 0.163     | 0.076 | 0.147           | 0.053 | 0.773            | 29.655 | 0.445   | 0.972         | 0.231           |
| iCAP1 & iCAP8  | 0.075     | 0.046 | 0.065           | 0.04  | 0.748            | 23.552 | 0.462   | 0.972         | 0.245           |
| iCAP1 & iCAP9  | 0.156     | 0.048 | 0.148           | 0.068 | 0.373            | 15.933 | 0.714   | 0.972         | 0.148           |
| iCAP1 & iCAP10 | 0.071     | 0.042 | 0.039           | 0.025 | 2.975            | 33.142 | 0.005   | 0.035         | 0.848           |
| iCAP1 & iCAP11 | 0.05      | 0.048 | 0.05            | 0.042 | -0.034           | 23.643 | 0.973   | 0.973         | -0.011          |
| iCAP1 & iCAP12 | 0.064     | 0.05  | 0.049           | 0.026 | 1.23             | 36.274 | 0.227   | 0.972         | 0.334           |
| iCAP1 & iCAP13 | 0.042     | 0.044 | 0.05            | 0.036 | -0.6             | 25.114 | 0.554   | 0.972         | -0.192          |
| iCAP2 & iCAP3  | 0.101     | 0.059 | 0.103           | 0.054 | -0.065           | 23.057 | 0.949   | 0.973         | -0.021          |
| iCAP2 & iCAP4  | 0.116     | 0.068 | 0.121           | 0.054 | -0.241           | 26.174 | 0.812   | 0.972         | -0.076          |
| iCAP2 & iCAP5  | 0.09      | 0.046 | 0.101           | 0.042 | -0.713           | 22.705 | 0.483   | 0.972         | -0.237          |
| iCAP2 & iCAP6  | 0.03      | 0.029 | 0.032           | 0.025 | -0.264           | 24.235 | 0.794   | 0.972         | -0.086          |
| iCAP2 & iCAP7  | 0.064     | 0.025 | 0.067           | 0.039 | -0.228           | 15.255 | 0.823   | 0.972         | -0.093          |
| iCAP2 & iCAP8  | 0.044     | 0.027 | 0.022           | 0.015 | 3.128            | 35.445 | 0.004   | 0.035         | 0.863           |
| iCAP2 & iCAP9  | 0.163     | 0.076 | 0.147           | 0.053 | 0.773            | 29.655 | 0.445   | 0.972         | 0.231           |
| iCAP2 & iCAP10 | 0.075     | 0.046 | 0.065           | 0.04  | 0.748            | 23.552 | 0.462   | 0.972         | 0.245           |
| iCAP2 & iCAP11 | 0.156     | 0.048 | 0.148           | 0.068 | 0.373            | 15.933 | 0.714   | 0.972         | 0.148           |
| iCAP2 & iCAP12 | 0.071     | 0.042 | 0.039           | 0.025 | 2.975            | 33.142 | 0.005   | 0.035         | 0.848           |
| iCAP2 & iCAP13 | 0.05      | 0.048 | 0.05            | 0.042 | -0.034           | 23.643 | 0.973   | 0.973         | -0.011          |
| iCAP3 & iCAP4  | 0.064     | 0.05  | 0.049           | 0.026 | 1.23             | 36.274 | 0.227   | 0.972         | 0.334           |

|                |       |       |       |       |        |        |       |       |        |
|----------------|-------|-------|-------|-------|--------|--------|-------|-------|--------|
| iCAP3 & iCAP5  | 0.042 | 0.044 | 0.05  | 0.036 | -0.6   | 25.114 | 0.554 | 0.972 | -0.192 |
| iCAP3 & iCAP6  | 0.101 | 0.059 | 0.103 | 0.054 | -0.065 | 23.057 | 0.949 | 0.973 | -0.021 |
| iCAP3 & iCAP7  | 0.116 | 0.068 | 0.121 | 0.054 | -0.241 | 26.174 | 0.812 | 0.972 | -0.076 |
| iCAP3 & iCAP8  | 0.09  | 0.046 | 0.101 | 0.042 | -0.713 | 22.705 | 0.483 | 0.972 | -0.237 |
| iCAP3 & iCAP9  | 0.03  | 0.029 | 0.032 | 0.025 | -0.264 | 24.235 | 0.794 | 0.972 | -0.086 |
| iCAP3 & iCAP10 | 0.064 | 0.025 | 0.067 | 0.039 | -0.228 | 15.255 | 0.823 | 0.972 | -0.093 |
| iCAP3 & iCAP11 | 0.044 | 0.027 | 0.022 | 0.015 | 3.128  | 35.445 | 0.004 | 0.035 | 0.863  |
| iCAP3 & iCAP12 | 0.163 | 0.076 | 0.147 | 0.053 | 0.773  | 29.655 | 0.445 | 0.972 | 0.231  |
| iCAP3 & iCAP13 | 0.075 | 0.046 | 0.065 | 0.04  | 0.748  | 23.552 | 0.462 | 0.972 | 0.245  |
| iCAP4 & iCAP5  | 0.156 | 0.048 | 0.148 | 0.068 | 0.373  | 15.933 | 0.714 | 0.972 | 0.148  |
| iCAP4 & iCAP6  | 0.071 | 0.042 | 0.039 | 0.025 | 2.975  | 33.142 | 0.005 | 0.035 | 0.848  |
| iCAP4 & iCAP7  | 0.05  | 0.048 | 0.05  | 0.042 | -0.034 | 23.643 | 0.973 | 0.973 | -0.011 |
| iCAP4 & iCAP8  | 0.064 | 0.05  | 0.049 | 0.026 | 1.23   | 36.274 | 0.227 | 0.972 | 0.334  |
| iCAP4 & iCAP9  | 0.042 | 0.044 | 0.05  | 0.036 | -0.6   | 25.114 | 0.554 | 0.972 | -0.192 |
| iCAP4 & iCAP10 | 0.101 | 0.059 | 0.103 | 0.054 | -0.065 | 23.057 | 0.949 | 0.973 | -0.021 |
| iCAP4 & iCAP11 | 0.116 | 0.068 | 0.121 | 0.054 | -0.241 | 26.174 | 0.812 | 0.972 | -0.076 |
| iCAP4 & iCAP12 | 0.09  | 0.046 | 0.101 | 0.042 | -0.713 | 22.705 | 0.483 | 0.972 | -0.237 |
| iCAP4 & iCAP13 | 0.03  | 0.029 | 0.032 | 0.025 | -0.264 | 24.235 | 0.794 | 0.972 | -0.086 |
| iCAP5 & iCAP6  | 0.064 | 0.025 | 0.067 | 0.039 | -0.228 | 15.255 | 0.823 | 0.972 | -0.093 |
| iCAP5 & iCAP7  | 0.044 | 0.027 | 0.022 | 0.015 | 3.128  | 35.445 | 0.004 | 0.035 | 0.863  |
| iCAP5 & iCAP8  | 0.163 | 0.076 | 0.147 | 0.053 | 0.773  | 29.655 | 0.445 | 0.972 | 0.231  |
| iCAP5 & iCAP9  | 0.075 | 0.046 | 0.065 | 0.04  | 0.748  | 23.552 | 0.462 | 0.972 | 0.245  |
| iCAP5 & iCAP10 | 0.156 | 0.048 | 0.148 | 0.068 | 0.373  | 15.933 | 0.714 | 0.972 | 0.148  |
| iCAP5 & iCAP11 | 0.071 | 0.042 | 0.039 | 0.025 | 2.975  | 33.142 | 0.005 | 0.035 | 0.848  |
| iCAP5 & iCAP12 | 0.05  | 0.048 | 0.05  | 0.042 | -0.034 | 23.643 | 0.973 | 0.973 | -0.011 |
| iCAP5 & iCAP13 | 0.064 | 0.05  | 0.049 | 0.026 | 1.23   | 36.274 | 0.227 | 0.972 | 0.334  |
| iCAP6 & iCAP7  | 0.042 | 0.044 | 0.05  | 0.036 | -0.6   | 25.114 | 0.554 | 0.972 | -0.192 |
| iCAP6 & iCAP8  | 0.101 | 0.059 | 0.103 | 0.054 | -0.065 | 23.057 | 0.949 | 0.973 | -0.021 |



|                 |       |       |       |       |        |        |       |       |        |
|-----------------|-------|-------|-------|-------|--------|--------|-------|-------|--------|
| iCAP6 & iCAP9   | 0.116 | 0.068 | 0.121 | 0.054 | -0.241 | 26.174 | 0.812 | 0.972 | -0.076 |
| iCAP6 & iCAP10  | 0.09  | 0.046 | 0.101 | 0.042 | -0.713 | 22.705 | 0.483 | 0.972 | -0.237 |
| iCAP6 & iCAP11  | 0.03  | 0.029 | 0.032 | 0.025 | -0.264 | 24.235 | 0.794 | 0.972 | -0.086 |
| iCAP6 & iCAP12  | 0.064 | 0.025 | 0.067 | 0.039 | -0.228 | 15.255 | 0.823 | 0.972 | -0.093 |
| iCAP6 & iCAP13  | 0.044 | 0.027 | 0.022 | 0.015 | 3.128  | 35.445 | 0.004 | 0.035 | 0.863  |
| iCAP7 & iCAP8   | 0.163 | 0.076 | 0.147 | 0.053 | 0.773  | 29.655 | 0.445 | 0.972 | 0.231  |
| iCAP7 & iCAP9   | 0.075 | 0.046 | 0.065 | 0.04  | 0.748  | 23.552 | 0.462 | 0.972 | 0.245  |
| iCAP7 & iCAP10  | 0.156 | 0.048 | 0.148 | 0.068 | 0.373  | 15.933 | 0.714 | 0.972 | 0.148  |
| iCAP7 & iCAP11  | 0.071 | 0.042 | 0.039 | 0.025 | 2.975  | 33.142 | 0.005 | 0.035 | 0.848  |
| iCAP7 & iCAP12  | 0.05  | 0.048 | 0.05  | 0.042 | -0.034 | 23.643 | 0.973 | 0.973 | -0.011 |
| iCAP7 & iCAP13  | 0.064 | 0.05  | 0.049 | 0.026 | 1.23   | 36.274 | 0.227 | 0.972 | 0.334  |
| iCAP8 & iCAP9   | 0.042 | 0.044 | 0.05  | 0.036 | -0.6   | 25.114 | 0.554 | 0.972 | -0.192 |
| iCAP8 & iCAP10  | 0.101 | 0.059 | 0.103 | 0.054 | -0.065 | 23.057 | 0.949 | 0.973 | -0.021 |
| iCAP8 & iCAP11  | 0.116 | 0.068 | 0.121 | 0.054 | -0.241 | 26.174 | 0.812 | 0.972 | -0.076 |
| iCAP8 & iCAP12  | 0.09  | 0.046 | 0.101 | 0.042 | -0.713 | 22.705 | 0.483 | 0.972 | -0.237 |
| iCAP8 & iCAP13  | 0.03  | 0.029 | 0.032 | 0.025 | -0.264 | 24.235 | 0.794 | 0.972 | -0.086 |
| iCAP9 & iCAP10  | 0.064 | 0.025 | 0.067 | 0.039 | -0.228 | 15.255 | 0.823 | 0.972 | -0.093 |
| iCAP9 & iCAP11  | 0.044 | 0.027 | 0.022 | 0.015 | 3.128  | 35.445 | 0.004 | 0.035 | 0.863  |
| iCAP9 & iCAP12  | 0.163 | 0.076 | 0.147 | 0.053 | 0.773  | 29.655 | 0.445 | 0.972 | 0.231  |
| iCAP9 & iCAP13  | 0.075 | 0.046 | 0.065 | 0.04  | 0.748  | 23.552 | 0.462 | 0.972 | 0.245  |
| iCAP10 & iCAP11 | 0.156 | 0.048 | 0.148 | 0.068 | 0.373  | 15.933 | 0.714 | 0.972 | 0.148  |
| iCAP10 & iCAP12 | 0.071 | 0.042 | 0.039 | 0.025 | 2.975  | 33.142 | 0.005 | 0.035 | 0.848  |
| iCAP10 & iCAP13 | 0.05  | 0.048 | 0.05  | 0.042 | -0.034 | 23.643 | 0.973 | 0.973 | -0.011 |
| iCAP11 & iCAP12 | 0.064 | 0.05  | 0.049 | 0.026 | 1.23   | 36.274 | 0.227 | 0.972 | 0.334  |
| iCAP11 & iCAP13 | 0.042 | 0.044 | 0.05  | 0.036 | -0.6   | 25.114 | 0.554 | 0.972 | -0.192 |
| iCAP12 & iCAP13 | 0.101 | 0.059 | 0.103 | 0.054 | -0.065 | 23.057 | 0.949 | 0.973 | -0.021 |

---

**Table S5.** Group comparison for the VPT and full-term control groups for the anti-coupling of the identified iCAPs networks

| Anti-coupling  | VPT group |       | Full-term group |       | Group comparison |        |         |               |                 |
|----------------|-----------|-------|-----------------|-------|------------------|--------|---------|---------------|-----------------|
|                | Mean      | SD    | Mean            | SD    | t                | df     | p-value | q-value (fdr) | Effect size (d) |
| iCAP1 & iCAP2  | 0.161     | 0.069 | 0.155           | 0.068 | 0.260            | 21.047 | 0.797   | 0.864         | 0.090           |
| iCAP1 & iCAP3  | 0.118     | 0.041 | 0.124           | 0.065 | -0.272           | 14.907 | 0.789   | 0.864         | -0.112          |
| iCAP1 & iCAP4  | 0.236     | 0.071 | 0.215           | 0.117 | 0.567            | 14.617 | 0.579   | 0.837         | 0.237           |
| iCAP1 & iCAP5  | 0.176     | 0.086 | 0.200           | 0.063 | -1.007           | 28.535 | 0.322   | 0.639         | -0.306          |
| iCAP1 & iCAP6  | 0.239     | 0.081 | 0.305           | 0.090 | -2.196           | 19.025 | 0.041   | 0.333         | -0.791          |
| iCAP1 & iCAP7  | 0.078     | 0.066 | 0.063           | 0.037 | 0.955            | 34.873 | 0.346   | 0.639         | 0.266           |
| iCAP1 & iCAP8  | 0.084     | 0.048 | 0.083           | 0.047 | 0.031            | 21.265 | 0.975   | 0.975         | 0.011           |
| iCAP1 & iCAP9  | 0.075     | 0.044 | 0.087           | 0.041 | -0.871           | 22.331 | 0.393   | 0.639         | -0.292          |
| iCAP1 & iCAP10 | 0.117     | 0.071 | 0.162           | 0.059 | -2.049           | 24.785 | 0.051   | 0.333         | -0.658          |
| iCAP1 & iCAP11 | 0.081     | 0.067 | 0.062           | 0.046 | 0.998            | 29.933 | 0.326   | 0.639         | 0.297           |
| iCAP1 & iCAP12 | 0.040     | 0.038 | 0.027           | 0.027 | 1.230            | 29.347 | 0.228   | 0.639         | 0.369           |
| iCAP1 & iCAP13 | 0.020     | 0.023 | 0.010           | 0.015 | 1.684            | 31.680 | 0.102   | 0.442         | 0.490           |
| iCAP2 & iCAP3  | 0.111     | 0.052 | 0.121           | 0.100 | -0.337           | 13.591 | 0.741   | 0.864         | -0.148          |
| iCAP2 & iCAP4  | 0.161     | 0.069 | 0.155           | 0.068 | 0.260            | 21.047 | 0.797   | 0.864         | 0.090           |
| iCAP2 & iCAP5  | 0.118     | 0.041 | 0.124           | 0.065 | -0.272           | 14.907 | 0.789   | 0.864         | -0.112          |
| iCAP2 & iCAP6  | 0.236     | 0.071 | 0.215           | 0.117 | 0.567            | 14.617 | 0.579   | 0.837         | 0.237           |
| iCAP2 & iCAP7  | 0.176     | 0.086 | 0.200           | 0.063 | -1.007           | 28.535 | 0.322   | 0.639         | -0.306          |
| iCAP2 & iCAP8  | 0.239     | 0.081 | 0.305           | 0.090 | -2.196           | 19.025 | 0.041   | 0.333         | -0.791          |
| iCAP2 & iCAP9  | 0.078     | 0.066 | 0.063           | 0.037 | 0.955            | 34.873 | 0.346   | 0.639         | 0.266           |
| iCAP2 & iCAP10 | 0.084     | 0.048 | 0.083           | 0.047 | 0.031            | 21.265 | 0.975   | 0.975         | 0.011           |
| iCAP2 & iCAP11 | 0.075     | 0.044 | 0.087           | 0.041 | -0.871           | 22.331 | 0.393   | 0.639         | -0.292          |
| iCAP2 & iCAP12 | 0.117     | 0.071 | 0.162           | 0.059 | -2.049           | 24.785 | 0.051   | 0.333         | -0.658          |
| iCAP2 & iCAP13 | 0.081     | 0.067 | 0.062           | 0.046 | 0.998            | 29.933 | 0.326   | 0.639         | 0.297           |
| iCAP3 & iCAP4  | 0.040     | 0.038 | 0.027           | 0.027 | 1.230            | 29.347 | 0.228   | 0.639         | 0.369           |

|                |       |       |       |       |        |        |       |       |        |
|----------------|-------|-------|-------|-------|--------|--------|-------|-------|--------|
| iCAP3 & iCAP5  | 0.020 | 0.023 | 0.010 | 0.015 | 1.684  | 31.680 | 0.102 | 0.442 | 0.490  |
| iCAP3 & iCAP6  | 0.111 | 0.052 | 0.121 | 0.100 | -0.337 | 13.591 | 0.741 | 0.864 | -0.148 |
| iCAP3 & iCAP7  | 0.161 | 0.069 | 0.155 | 0.068 | 0.260  | 21.047 | 0.797 | 0.864 | 0.090  |
| iCAP3 & iCAP8  | 0.118 | 0.041 | 0.124 | 0.065 | -0.272 | 14.907 | 0.789 | 0.864 | -0.112 |
| iCAP3 & iCAP9  | 0.236 | 0.071 | 0.215 | 0.117 | 0.567  | 14.617 | 0.579 | 0.837 | 0.237  |
| iCAP3 & iCAP10 | 0.176 | 0.086 | 0.200 | 0.063 | -1.007 | 28.535 | 0.322 | 0.639 | -0.306 |
| iCAP3 & iCAP11 | 0.239 | 0.081 | 0.305 | 0.090 | -2.196 | 19.025 | 0.041 | 0.333 | -0.791 |
| iCAP3 & iCAP12 | 0.078 | 0.066 | 0.063 | 0.037 | 0.955  | 34.873 | 0.346 | 0.639 | 0.266  |
| iCAP3 & iCAP13 | 0.084 | 0.048 | 0.083 | 0.047 | 0.031  | 21.265 | 0.975 | 0.975 | 0.011  |
| iCAP4 & iCAP5  | 0.075 | 0.044 | 0.087 | 0.041 | -0.871 | 22.331 | 0.393 | 0.639 | -0.292 |
| iCAP4 & iCAP6  | 0.117 | 0.071 | 0.162 | 0.059 | -2.049 | 24.785 | 0.051 | 0.333 | -0.658 |
| iCAP4 & iCAP7  | 0.081 | 0.067 | 0.062 | 0.046 | 0.998  | 29.933 | 0.326 | 0.639 | 0.297  |
| iCAP4 & iCAP8  | 0.040 | 0.038 | 0.027 | 0.027 | 1.230  | 29.347 | 0.228 | 0.639 | 0.369  |
| iCAP4 & iCAP9  | 0.020 | 0.023 | 0.010 | 0.015 | 1.684  | 31.680 | 0.102 | 0.442 | 0.490  |
| iCAP4 & iCAP10 | 0.111 | 0.052 | 0.121 | 0.100 | -0.337 | 13.591 | 0.741 | 0.864 | -0.148 |
| iCAP4 & iCAP11 | 0.161 | 0.069 | 0.155 | 0.068 | 0.260  | 21.047 | 0.797 | 0.864 | 0.090  |
| iCAP4 & iCAP12 | 0.118 | 0.041 | 0.124 | 0.065 | -0.272 | 14.907 | 0.789 | 0.864 | -0.112 |
| iCAP4 & iCAP13 | 0.236 | 0.071 | 0.215 | 0.117 | 0.567  | 14.617 | 0.579 | 0.837 | 0.237  |
| iCAP5 & iCAP6  | 0.176 | 0.086 | 0.200 | 0.063 | -1.007 | 28.535 | 0.322 | 0.639 | -0.306 |
| iCAP5 & iCAP7  | 0.239 | 0.081 | 0.305 | 0.090 | -2.196 | 19.025 | 0.041 | 0.333 | -0.791 |
| iCAP5 & iCAP8  | 0.078 | 0.066 | 0.063 | 0.037 | 0.955  | 34.873 | 0.346 | 0.639 | 0.266  |
| iCAP5 & iCAP9  | 0.084 | 0.048 | 0.083 | 0.047 | 0.031  | 21.265 | 0.975 | 0.975 | 0.011  |
| iCAP5 & iCAP10 | 0.075 | 0.044 | 0.087 | 0.041 | -0.871 | 22.331 | 0.393 | 0.639 | -0.292 |
| iCAP5 & iCAP11 | 0.117 | 0.071 | 0.162 | 0.059 | -2.049 | 24.785 | 0.051 | 0.333 | -0.658 |
| iCAP5 & iCAP12 | 0.081 | 0.067 | 0.062 | 0.046 | 0.998  | 29.933 | 0.326 | 0.639 | 0.297  |
| iCAP5 & iCAP13 | 0.040 | 0.038 | 0.027 | 0.027 | 1.230  | 29.347 | 0.228 | 0.639 | 0.369  |
| iCAP6 & iCAP7  | 0.020 | 0.023 | 0.010 | 0.015 | 1.684  | 31.680 | 0.102 | 0.442 | 0.490  |
| iCAP6 & iCAP8  | 0.111 | 0.052 | 0.121 | 0.100 | -0.337 | 13.591 | 0.741 | 0.864 | -0.148 |

|                 |       |       |       |       |        |        |       |       |        |
|-----------------|-------|-------|-------|-------|--------|--------|-------|-------|--------|
| iCAP6 & iCAP9   | 0.161 | 0.069 | 0.155 | 0.068 | 0.260  | 21.047 | 0.797 | 0.864 | 0.090  |
| iCAP6 & iCAP10  | 0.118 | 0.041 | 0.124 | 0.065 | -0.272 | 14.907 | 0.789 | 0.864 | -0.112 |
| iCAP6 & iCAP11  | 0.236 | 0.071 | 0.215 | 0.117 | 0.567  | 14.617 | 0.579 | 0.837 | 0.237  |
| iCAP6 & iCAP12  | 0.176 | 0.086 | 0.200 | 0.063 | -1.007 | 28.535 | 0.322 | 0.639 | -0.306 |
| iCAP6 & iCAP13  | 0.239 | 0.081 | 0.305 | 0.090 | -2.196 | 19.025 | 0.041 | 0.333 | -0.791 |
| iCAP7 & iCAP8   | 0.078 | 0.066 | 0.063 | 0.037 | 0.955  | 34.873 | 0.346 | 0.639 | 0.266  |
| iCAP7 & iCAP9   | 0.084 | 0.048 | 0.083 | 0.047 | 0.031  | 21.265 | 0.975 | 0.975 | 0.011  |
| iCAP7 & iCAP10  | 0.075 | 0.044 | 0.087 | 0.041 | -0.871 | 22.331 | 0.393 | 0.639 | -0.292 |
| iCAP7 & iCAP11  | 0.117 | 0.071 | 0.162 | 0.059 | -2.049 | 24.785 | 0.051 | 0.333 | -0.658 |
| iCAP7 & iCAP12  | 0.081 | 0.067 | 0.062 | 0.046 | 0.998  | 29.933 | 0.326 | 0.639 | 0.297  |
| iCAP7 & iCAP13  | 0.040 | 0.038 | 0.027 | 0.027 | 1.230  | 29.347 | 0.228 | 0.639 | 0.369  |
| iCAP8 & iCAP9   | 0.020 | 0.023 | 0.010 | 0.015 | 1.684  | 31.680 | 0.102 | 0.442 | 0.490  |
| iCAP8 & iCAP10  | 0.111 | 0.052 | 0.121 | 0.100 | -0.337 | 13.591 | 0.741 | 0.864 | -0.148 |
| iCAP8 & iCAP11  | 0.161 | 0.069 | 0.155 | 0.068 | 0.260  | 21.047 | 0.797 | 0.864 | 0.090  |
| iCAP8 & iCAP12  | 0.118 | 0.041 | 0.124 | 0.065 | -0.272 | 14.907 | 0.789 | 0.864 | -0.112 |
| iCAP8 & iCAP13  | 0.236 | 0.071 | 0.215 | 0.117 | 0.567  | 14.617 | 0.579 | 0.837 | 0.237  |
| iCAP9 & iCAP10  | 0.176 | 0.086 | 0.200 | 0.063 | -1.007 | 28.535 | 0.322 | 0.639 | -0.306 |
| iCAP9 & iCAP11  | 0.239 | 0.081 | 0.305 | 0.090 | -2.196 | 19.025 | 0.041 | 0.333 | -0.791 |
| iCAP9 & iCAP12  | 0.078 | 0.066 | 0.063 | 0.037 | 0.955  | 34.873 | 0.346 | 0.639 | 0.266  |
| iCAP9 & iCAP13  | 0.084 | 0.048 | 0.083 | 0.047 | 0.031  | 21.265 | 0.975 | 0.975 | 0.011  |
| iCAP10 & iCAP11 | 0.075 | 0.044 | 0.087 | 0.041 | -0.871 | 22.331 | 0.393 | 0.639 | -0.292 |
| iCAP10 & iCAP12 | 0.117 | 0.071 | 0.162 | 0.059 | -2.049 | 24.785 | 0.051 | 0.333 | -0.658 |
| iCAP10 & iCAP13 | 0.081 | 0.067 | 0.062 | 0.046 | 0.998  | 29.933 | 0.326 | 0.639 | 0.297  |
| iCAP11 & iCAP12 | 0.040 | 0.038 | 0.027 | 0.027 | 1.230  | 29.347 | 0.228 | 0.639 | 0.369  |
| iCAP11 & iCAP13 | 0.020 | 0.023 | 0.010 | 0.015 | 1.684  | 31.680 | 0.102 | 0.442 | 0.490  |
| iCAP12 & iCAP13 | 0.111 | 0.052 | 0.121 | 0.100 | -0.337 | 13.591 | 0.741 | 0.864 | -0.148 |

---

**Table S6.** Group comparison for the VPT and full-term control groups for the Amplitude-Laterality Index (A-LI) of the identified iCAPs networks

| Amplitude-LI | VPT group |       | Full-term group |       | Group comparison |        |         |               |                 |
|--------------|-----------|-------|-----------------|-------|------------------|--------|---------|---------------|-----------------|
|              | Mean      | SD    | Mean_FT         | SD_FT | t                | df     | p-value | q-value (fdr) | Effect size (d) |
| iCAP 1       | 0.027     | 0.034 | 0.030           | 0.046 | -0.203           | 16.268 | 0.842   | 0.984         | -0.079          |
| iCAP 2       | 0.043     | 0.032 | 0.049           | 0.036 | -0.514           | 18.613 | 0.613   | 0.984         | -0.187          |
| iCAP 3       | 0.024     | 0.056 | 0.029           | 0.061 | -0.239           | 19.421 | 0.814   | 0.984         | -0.085          |
| iCAP 4       | 0.024     | 0.061 | 0.014           | 0.062 | 0.471            | 20.509 | 0.642   | 0.984         | 0.164           |
| iCAP 5       | 0.009     | 0.038 | 0.008           | 0.047 | 0.020            | 17.263 | 0.984   | 0.984         | 0.008           |
| iCAP 6       | 0.063     | 0.081 | 0.024           | 0.040 | 2.047            | 37.099 | 0.048   | 0.311         | 0.547           |
| iCAP 7       | 0.395     | 0.124 | 0.423           | 0.098 | -0.739           | 26.202 | 0.466   | 0.984         | -0.232          |
| iCAP 8       | 0.024     | 0.045 | 0.009           | 0.055 | 0.834            | 17.721 | 0.416   | 0.984         | 0.311           |
| iCAP 9       | -0.393    | 0.118 | -0.390          | 0.110 | -0.085           | 22.175 | 0.933   | 0.984         | -0.029          |
| iCAP 10      | 0.041     | 0.085 | 0.026           | 0.078 | 0.555            | 22.577 | 0.584   | 0.984         | 0.185           |
| iCAP 11      | 0.029     | 0.047 | 0.040           | 0.049 | -0.639           | 19.917 | 0.530   | 0.984         | -0.225          |
| iCAP 12      | 0.019     | 0.048 | 0.064           | 0.039 | -3.049           | 25.465 | 0.005   | 0.069         | -0.968          |
| iCAP 13      | 0.030     | 0.076 | 0.022           | 0.090 | 0.263            | 18.077 | 0.795   | 0.984         | 0.097           |

**Table S7.** Associations between socio-emotional outcomes and occurrence of the 13 iCAPs in the very preterm (VPT) and full-term (FT) groups based on the PLSC analysis, corresponding to Figure 1. The table shows mean saliences, bootstrap-estimated standard deviations and bootstrap ratio Z-scores for socio-emotional and iCAPs occurrence measures for the significant latent component 1.

| <b>Saliense type:<br/>Socio-emotional measures</b> | <b>Very preterm group</b>                              |                          | <b>Full-term control group</b>                         |                          |
|----------------------------------------------------|--------------------------------------------------------|--------------------------|--------------------------------------------------------|--------------------------|
|                                                    | Mean saliense (bootstrap estimated standard deviation) | Bootstrap ratio Z-scores | Mean saliense (bootstrap estimated standard deviation) | Bootstrap ratio Z-scores |
| <i>Affect recognition</i>                          | 0.05 (0.11)                                            | 0.80                     | 0.26 (0.12)                                            | 4.97                     |
| <i>Theory of mind</i>                              | -0.11 (0.15)                                           | -0.82                    | 0.14 (0.13)                                            | 4.42                     |
| <i>Internalised problems</i>                       | -0.03 (0.15)                                           | -0.47                    | -0.02 (0.12)                                           | -2.10                    |
| <i>Emotional control</i>                           | 0.35 (0.17)                                            | 2.47                     | 0.09 (0.15)                                            | -1.65                    |
| <b>Coupling duration measures</b>                  | <b>For both the very preterm and full-term groups</b>  |                          |                                                        |                          |
|                                                    | Mean saliense (bootstrap estimated standard deviation) | Bootstrap ratio Z-scores |                                                        |                          |
| <i>iCAP 1</i>                                      | 0.02 (0.1)                                             | -1.55                    |                                                        |                          |
| <i>iCAP 2</i>                                      | -0.13 (0.14)                                           | -1.37                    |                                                        |                          |
| <i>iCAP 3</i>                                      | -0.2 (0.11)                                            | -3.74                    |                                                        |                          |
| <i>iCAP 4</i>                                      | -0.18 (0.12)                                           | -2.46                    |                                                        |                          |
| <i>iCAP 5</i>                                      | -0.01 (0.12)                                           | -1.61                    |                                                        |                          |
| <i>iCAP 6</i>                                      | -0.07 (0.11)                                           | -3.20                    |                                                        |                          |
| <i>iCAP 7</i>                                      | -0.1 (0.1)                                             | -1.71                    |                                                        |                          |
| <i>iCAP 8</i>                                      | -0.07 (0.12)                                           | -2.56                    |                                                        |                          |
| <i>iCAP 9</i>                                      | -0.14 (0.1)                                            | -3.54                    |                                                        |                          |
| <i>iCAP 10</i>                                     | 0.01 (0.1)                                             | -3.28                    |                                                        |                          |
| <i>iCAP 11</i>                                     | 0.2 (0.11)                                             | 0.01                     |                                                        |                          |
| <i>iCAP 12</i>                                     | -0.14 (0.14)                                           | -2.02                    |                                                        |                          |
| <i>iCAP 13</i>                                     | 0.12 (0.12)                                            | 2.33                     |                                                        |                          |

**Table S8.** Associations between socio-emotional outcomes and coupling duration of the 13 pair of iCAPs in the very preterm (VPT) and full-term (FT) groups based on the PLSC analysis, corresponding to Figure 2. The table shows mean saliences, bootstrap-estimated standard deviations and bootstrap ratio Z-scores for socio-emotional and iCAPs coupling measures for the significant latent component 1.

| <b>Saliency type:<br/>Socio-emotional measures</b> | <b>Very preterm group</b>                              |                          | <b>Full-term control group</b>                         |                          |
|----------------------------------------------------|--------------------------------------------------------|--------------------------|--------------------------------------------------------|--------------------------|
|                                                    | Mean saliency (bootstrap estimated standard deviation) | Bootstrap ratio Z-scores | Mean saliency (bootstrap estimated standard deviation) | Bootstrap ratio Z-scores |
| <i>Affect recognition</i>                          | -0.15 (0.07)                                           | -2.63                    | -0.18 (0.07)                                           | -2.55                    |
| <i>Theory of mind</i>                              | 0.07 (0.05)                                            | 1.48                     | 0.01 (0.08)                                            | -1.14                    |
| <i>Internalised problems</i>                       | -0.3 (0.06)                                            | -5.55                    | -0.08 (0.07)                                           | -1.12                    |
| <i>Emotional control</i>                           | -0.82 (0.06)                                           | -14.07                   | -0.15 (0.08)                                           | 1.08                     |
| <b>Coupling duration measures</b>                  | <b>For both the very preterm and full-term groups</b>  |                          |                                                        |                          |
|                                                    | Mean saliency (bootstrap estimated standard deviation) | Bootstrap ratio Z-scores |                                                        |                          |
| <i>iCAP1 &amp; iCAP2</i>                           | -1.34                                                  | -0.05 (0.05)             |                                                        |                          |
| <i>iCAP1 &amp; iCAP3</i>                           | 5.54                                                   | 0.16 (0.04)              |                                                        |                          |
| <i>iCAP1 &amp; iCAP4</i>                           | 0.79                                                   | 0.04 (0.05)              |                                                        |                          |
| <i>iCAP1 &amp; iCAP5</i>                           | 0.30                                                   | 0.02 (0.06)              |                                                        |                          |
| <i>iCAP1 &amp; iCAP6</i>                           | -6.17                                                  | -0.19 (0.04)             |                                                        |                          |
| <i>iCAP1 &amp; iCAP7</i>                           | -0.19                                                  | -0.02 (0.05)             |                                                        |                          |
| <i>iCAP1 &amp; iCAP8</i>                           | -0.96                                                  | -0.01 (0.05)             |                                                        |                          |
| <i>iCAP1 &amp; iCAP9</i>                           | -1.43                                                  | -0.06 (0.04)             |                                                        |                          |
| <i>iCAP1 &amp; iCAP10</i>                          | 0.52                                                   | 0.02 (0.05)              |                                                        |                          |
| <i>iCAP1 &amp; iCAP11</i>                          | -1.02                                                  | -0.05 (0.08)             |                                                        |                          |
| <i>iCAP1 &amp; iCAP12</i>                          | -0.72                                                  | -0.04 (0.05)             |                                                        |                          |
| <i>iCAP1 &amp; iCAP13</i>                          | -2.20                                                  | -0.07 (0.04)             |                                                        |                          |
| <i>iCAP2 &amp; iCAP3</i>                           | -3.12                                                  | -0.12 (0.05)             |                                                        |                          |
| <i>iCAP2 &amp; iCAP4</i>                           | 0.23                                                   | 0.02 (0.04)              |                                                        |                          |
| <i>iCAP2 &amp; iCAP5</i>                           | 0.27                                                   | 0.03 (0.04)              |                                                        |                          |
| <i>iCAP2 &amp; iCAP6</i>                           | -0.69                                                  | -0.04 (0.06)             |                                                        |                          |
| <i>iCAP2 &amp; iCAP7</i>                           | -0.32                                                  | -0.02 (0.06)             |                                                        |                          |
| <i>iCAP2 &amp; iCAP8</i>                           | -2.15                                                  | -0.11 (0.06)             |                                                        |                          |
| <i>iCAP2 &amp; iCAP9</i>                           | -4.16                                                  | -0.16 (0.04)             |                                                        |                          |

|                           |       |              |
|---------------------------|-------|--------------|
| <i>iCAP2 &amp; iCAP10</i> | 0.49  | 0.01 (0.05)  |
| <i>iCAP2 &amp; iCAP11</i> | -1.22 | -0.08 (0.07) |
| <i>iCAP2 &amp; iCAP12</i> | -3.02 | -0.15 (0.05) |
| <i>iCAP2 &amp; iCAP13</i> | -3.21 | -0.11 (0.04) |
| <i>iCAP3 &amp; iCAP4</i>  | -1.06 | -0.04 (0.06) |
| <i>iCAP3 &amp; iCAP5</i>  | -2.42 | -0.1 (0.05)  |
| <i>iCAP3 &amp; iCAP6</i>  | -1.15 | -0.05 (0.07) |
| <i>iCAP3 &amp; iCAP7</i>  | 1.63  | 0.07 (0.05)  |
| <i>iCAP3 &amp; iCAP8</i>  | -1.92 | -0.08 (0.05) |
| <i>iCAP3 &amp; iCAP9</i>  | 1.65  | 0.07 (0.06)  |
| <i>iCAP3 &amp; iCAP10</i> | -0.98 | -0.04 (0.07) |
| <i>iCAP3 &amp; iCAP11</i> | -0.36 | 0.01 (0.07)  |
| <i>iCAP3 &amp; iCAP12</i> | -2.72 | -0.13 (0.05) |
| <i>iCAP3 &amp; iCAP13</i> | -2.98 | -0.12 (0.04) |
| <i>iCAP4 &amp; iCAP5</i>  | -1.44 | -0.05 (0.06) |
| <i>iCAP4 &amp; iCAP6</i>  | 4.98  | 0.19 (0.04)  |
| <i>iCAP4 &amp; iCAP7</i>  | -0.52 | -0.01 (0.06) |
| <i>iCAP4 &amp; iCAP8</i>  | -1.18 | -0.06 (0.05) |
| <i>iCAP4 &amp; iCAP9</i>  | 0.06  | 0 (0.04)     |
| <i>iCAP4 &amp; iCAP10</i> | -3.83 | -0.17 (0.06) |
| <i>iCAP4 &amp; iCAP11</i> | -0.05 | -0.01 (0.06) |
| <i>iCAP4 &amp; iCAP12</i> | -2.07 | -0.09 (0.06) |
| <i>iCAP4 &amp; iCAP13</i> | -2.10 | -0.08 (0.04) |
| <i>iCAP5 &amp; iCAP6</i>  | 1.75  | 0.07 (0.06)  |
| <i>iCAP5 &amp; iCAP7</i>  | -0.09 | -0.03 (0.07) |
| <i>iCAP5 &amp; iCAP8</i>  | -9.46 | -0.21 (0.03) |
| <i>iCAP5 &amp; iCAP9</i>  | -2.59 | -0.15 (0.06) |
| <i>iCAP5 &amp; iCAP10</i> | -3.98 | -0.14 (0.05) |
| <i>iCAP5 &amp; iCAP11</i> | -0.01 | 0.01 (0.05)  |
| <i>iCAP5 &amp; iCAP12</i> | 0.32  | 0.02 (0.05)  |
| <i>iCAP5 &amp; iCAP13</i> | -2.36 | -0.09 (0.05) |
| <i>iCAP6 &amp; iCAP7</i>  | -0.14 | -0.02 (0.08) |
| <i>iCAP6 &amp; iCAP8</i>  | -1.61 | -0.06 (0.06) |
| <i>iCAP6 &amp; iCAP9</i>  | -4.83 | -0.21 (0.05) |
| <i>iCAP6 &amp; iCAP10</i> | 0.43  | 0.02 (0.07)  |



|                            |       |              |
|----------------------------|-------|--------------|
| <i>iCAP6 &amp; iCAP11</i>  | -0.72 | -0.04 (0.06) |
| <i>iCAP6 &amp; iCAP12</i>  | -0.34 | -0.01 (0.04) |
| <i>iCAP6 &amp; iCAP13</i>  | -3.51 | -0.15 (0.05) |
| <i>iCAP7 &amp; iCAP8</i>   | 0.04  | 0.01 (0.07)  |
| <i>iCAP7 &amp; iCAP9</i>   | -1.67 | -0.08 (0.05) |
| <i>iCAP7 &amp; iCAP10</i>  | -0.09 | 0 (0.06)     |
| <i>iCAP7 &amp; iCAP11</i>  | -1.88 | -0.07 (0.06) |
| <i>iCAP7 &amp; iCAP12</i>  | -2.84 | -0.12 (0.06) |
| <i>iCAP7 &amp; iCAP13</i>  | 0.19  | 0 (0.05)     |
| <i>iCAP8 &amp; iCAP9</i>   | -1.71 | -0.07 (0.06) |
| <i>iCAP8 &amp; iCAP10</i>  | -3.07 | -0.12 (0.05) |
| <i>iCAP8 &amp; iCAP11</i>  | -0.20 | 0.01 (0.06)  |
| <i>iCAP8 &amp; iCAP12</i>  | 3.50  | 0.13 (0.04)  |
| <i>iCAP8 &amp; iCAP13</i>  | -2.21 | -0.1 (0.06)  |
| <i>iCAP9 &amp; iCAP10</i>  | 4.55  | 0.14 (0.04)  |
| <i>iCAP9 &amp; iCAP11</i>  | -2.64 | -0.09 (0.05) |
| <i>iCAP9 &amp; iCAP12</i>  | -3.24 | -0.12 (0.04) |
| <i>iCAP9 &amp; iCAP13</i>  | -4.14 | -0.12 (0.05) |
| <i>iCAP10 &amp; iCAP11</i> | -1.77 | -0.07 (0.05) |
| <i>iCAP10 &amp; iCAP12</i> | -1.07 | -0.05 (0.06) |
| <i>iCAP10 &amp; iCAP13</i> | -0.67 | -0.03 (0.04) |
| <i>iCAP11 &amp; iCAP12</i> | -2.41 | -0.09 (0.04) |
| <i>iCAP11 &amp; iCAP13</i> | -4.10 | -0.13 (0.04) |
| <i>iCAP12 &amp; iCAP13</i> | -0.56 | -0.02 (0.07) |
